# Supplementary material for: Towards More Accurate Determination of the Thermoelectric Properties of Bi2Se3 Epifilms by Suspension via Nanomachining Techniques
Source: MDPI journal article supplement (doi:10.3390/s22208042), 2022-10-21
Supplement: s1 [file s1]

Supplemental Material for

**Towards more accurate determination of the thermoelectric properties of Bi<sub>2</sub>Se<sub>3</sub> epifilms by suspension via nanomachining techniques:  
a detailed description of determining thermal conductivity ( $\kappa$ )**

Donguk Kim, Chanuk Yang, and Yun Daniel Park

We utilize the self-heating  $3\omega$  method to accurately determine the thermal conductivity of the Bi<sub>2</sub>Se<sub>3</sub> epifilm. An ac-electrical current ( $I = I_o \sin \omega t$ ) is sourced across the nanomachined suspended Bi<sub>2</sub>Se<sub>3</sub> nanobeam, which induce Joule heating ( $P = 0.5I_o^2 R(1 - \cos 2\omega t)$ ), where  $R$  is the electrical resistance of the nanobeam and a corresponding temperature and resistance fluctuation at  $2\omega$ . Then, the voltage across the nanobeam fluctuates at  $3\omega$  ( $V = I_o \sin \omega t R_{2\omega}$ ). The amplitude of  $V_{3\omega}$  can be determined from the 1D heat diffusion equation for metallic-like materials. Here, we assume that the nanomachined beam structure best allows us to approximate the 1D heat diffusion equation. An explicit solution can be found at a low frequency limit:

$$\kappa = \frac{4RR'L}{\pi^4 A} \frac{I^3}{V_{3\omega}}$$

The nanobeam structure also facilitates boundary and initial conditions. From temperature dependence of the electrical resistance as well as  $I$ - $V$  measurements, we find the Bi<sub>2</sub>Se<sub>3</sub> to be metallic-like with pure Ohmic behavior. To measure  $V_{3\omega}$  and electrical resistance simultaneously, we had utilized two ac-lock-in amplifiers. We source a current by placing the nanobeam and a load resistor in series with a variable ac-voltage ( $f = 13$  Hz). The lock-in ( $f = 13$  Hz voltage) is recorded to determine the electrical resistance. A second lock-in ( $f = 39$  Hz) records the  $V_{3\omega}$ .

We now detail the determination of thermal conductivity ( $\kappa$ ) at 300 K. Figure S1, replots the figure 5(b) in the main text, a 200 nm Bi<sub>2</sub>Se<sub>3</sub> nanobeam. The slope of the linear fit is related to  $(\pi^4 A \kappa / 4 L R R')$ . Figure S2, plots the temperature dependence of the same sample. The geometrical dimensions, length and width, of the beam is measured from SEM and thickness is measured by stylus profilometer and from RHEED oscillation calibrated growth rate and deposition time.

Then, the thermal conductivity can be calculated as

$$\kappa = \frac{4 L R R'}{\pi^4 A} \frac{I^3}{V_{3\omega}} = \frac{4 \times 111 \mu\text{m} \times 2110 \Omega \times 5.23 \Omega/\text{K}}{\pi^4 \times 200 \text{nm} \times 4.03 \mu\text{m}} \times 3.12 \times 10^{-11} \text{A}^3/\text{V} = 1.95 \text{W/mK}$$

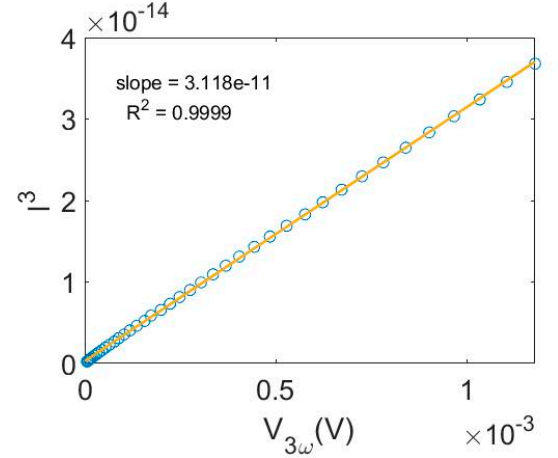

**Figure S1** – Replot of figure 5(b) in main text.

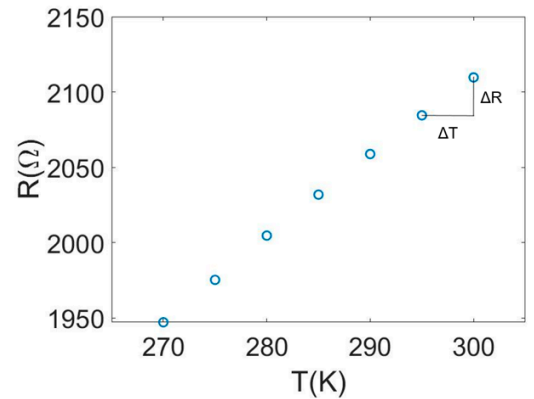

**Figure S2** – Temperature dependence of 200 nm Bi<sub>2</sub>Se<sub>3</sub> nanobeam.
